# Supplementary material for: A strategy to find novel candidate anti-Alzheimer’s disease drugs by constructing interaction networks between drug targets and natural compounds in medical plants
Source: PeerJ. 2018 May 11;6:e4756. doi: 10.7717/peerj.4756 (PMC5951129; doi:10.7717/peerj.4756)
Supplement: Table S1 [file peerj-06-4756-s001.xlsx]

## Sheet: Sheet1
Integrity Name	Protein Name	Gene Name	UniProt ID	PDB ID	Ligands ID	Center X	Center Y	Center Z	Pubmed ID
PLA2	Phospholipase A2, membrane associated	PLA2G2A	p14555	1db4	8IN	58.8	31.17	44.58	21214562
HMG-COA	3-hydroxy-3-methylglutaryl-coenzyme A reductase	HMGCR	p04035	1dqa	NAP	-1.82	28.32	35.15	21244355	18425343
Caspase-3	Caspase-3	CASP3	p42574	1nme	159	42.58	98.24	20.91	28138159	27220334
MAOB	Amine oxidase [flavin-containing] B	MAOB	p27338	1oja	ISN	52.94	154.19	24.78	28988627	29033232	28642233
PDE4	cAMP-specific 3',5'-cyclic phosphodiesterase 4D	PDE4D	q08499	1tb7	AMP	23.04	-0.12	24.94	25371167	26211680
FTase	Protein farnesyltransferase subunit beta	FNTB	p49356	1tn6	FII	17.51	127.29	-1.84	24136196
QC	Glutaminyl-peptide cyclotransferase	QPCT	q16769	2afw	AHN	-16.2	2.68	21.39	24164736	28700245
TNF	Tumor necrosis factor	TNF	p01375	2az5	307	-22	69.28	37.19	24998784	21891866
IDO	Indoleamine 2,3-dioxygenase 1	IDO1	p14902	2d0t	PIM	58.27	52.85	17.06	25079795	20847417
Fyn	Tyrosine-protein kinase Fyn	FYN	p06241	2dq7	STU	-18.34	17.49	-10.87	24495408
HDAC	Histone deacetylase 4	HDAC4	p56524	2vqm	HA3	21.05	-12.09	1.44	26280576	21941604	22914591	23184605
MAOA	Amine oxidase [flavin-containing] A	MAOA	p21397	2z5y	HRM	-40.23	-26.91	-14.11	28109809	27840401	26104056
lyn	Tyrosine-protein kinase Lyn	LYN	p07948	3a4o	STU	-3.24	-20	-19.31	15853747	22673542
JNK(SAPK1)	Mitogen-activated protein kinase 10	MAPK10	p53779	3g9n	J88	19.84	27.87	21.61	11208906	16772869
EGFR	Epidermal growth factor receptor	EGFR	p00533	3ika	0UN	-9.23	18.31	32.71	23019586
RAR	Retinoic acid receptor alpha	RARA	p10276	3kmr	EQN	-7.94	-9.15	-12.99	24916544	24582848	26682679
RAGE	Advanced glycosylation end product-specific receptor	AGER	q15109	3o3u	MLR	20.05	19.19	68.94	26175217	19464758
BACE-1	Beta-secretase 1	BACE1	p56817	4dju	0KK	22.2	9.7	19.08	28749667	28382866
AchE	Acetylcholinesterase	ACHE	p22303	4ey5	HUP	-8.88	-43.14	32.12	23277790
GABA(B)	Gamma-aminobutyric acid type B receptor subunit 1	GABBR1	q9ubs5	4ms4	2C0	-21.27	16.7	-31.47	25566747
RXR	Retinoic acid receptor RXR-alpha	RXRA	p19793	4oc7	2QO	70.42	-18.25	107.18	25709453	22323736
MGLUR	Metabotropic glutamate receptor 3	GRM3	q14832	4xar	40F	49.37	-26.29	9.43	15190683	21159998
DYRK1A	Dual specificity tyrosine-phosphorylation-regulated kinase 1A	DYRK1A	q13627	4ylk	4E2	18.48	51.41	37.73	24312003
GLP-1R	Glucagon-like peptide 1 receptor	GLP1R	p43220	4zgm	32M	6.82	54.6	-5.07	29050859	25869785
SIRT1	NAD-dependent protein deacetylase sirtuin-1	SIRT1	q96eb6	4zzj	4TQ	-3.84	43.7	-2.22	27836195
FGFR1	Fibroblast growth factor receptor 1	FGFR1	p11362	5a46	38O	88.34	0.66	9.74	9748519
α7NACHR	Neuronal acetylcholine receptor subunit alpha-7	CHRNA7	p36544	5afh	L0B	-28.26	-26.48	-16.08	29159020	29089979
AMPA	Glutamate receptor 2	GRIA2	p42262	5h8s	5YC	20.73	7.26	29.48	28886144
SIG-1R	Sigma non-opioid intracellular receptor 1	SIGMAR1	q99720	5hk1	61W	11.86	37.01	-35.96	PMC2701284	PMC3717544
CKI-δ	Casein kinase I isoform delta	CSNK1D	p48730	5ih5	AUE	-39.91	20.35	-0.43	18799313	10924763
