# Supplementary material for: A strategy to find novel candidate anti-Alzheimer’s disease drugs by constructing interaction networks between drug targets and natural compounds in medical plants
Source: PeerJ. 2018 May 11;6:e4756. doi: 10.7717/peerj.4756 (PMC5951129; doi:10.7717/peerj.4756)
Supplement: Table S2 [file peerj-06-4756-s002.xlsx]

## Sheet: Sheet1
Traditional Chinese medicine prescription	male/female/total	Article title	Publication year	References
石菖蒲(Rhizoma Acori Tatarinowii)、郁金(Radix Curcumae)、茯苓(Poria cocos)、胆南星(Arisaema Cum Bile)、远志(Radix Polygalae)、天麻(Rhizoma Gastrodiae)、鹿角胶(Deerhorn Glue)、熟地(Radix Rehmanniae)、山药(Rhizoma Dioscoreae)、当归(Radix Angelicae Sinensis)、水蛭(Hirudo)、红花(Flos Carthami)	41/11/52	保元益智散治疗老年痴呆52例临床观察	2008	吴向东, 薛艳萍. 保元益智散治疗老年痴呆52例临床观察[J]. 中国中医药科技, 2008, 15(4):252-252.
药用桃仁(Juglans regia)、红花(Flos Carthami)、当归(Radix Angelicae Sinensis)、赤芍(Radix Paeoniae Rubra)、枳壳(Fructus Aurantii)、柴胡(Radix Bupleuri)、桔梗(Radix Platycodonis)、川芎(Rhizoma Chuanxiong)、甘草(Radix Glycyrrhizae)、牛膝(Achyranthes bidentata)	25/15/40	辨证治疗老年痴呆症40例	2008	薛俊霞. 辨证治疗老年痴呆症40例[J]. 实用中医内科杂志, 2008, 22(2):18-18.
药用熟地(Radix Rehmanniae)、肉苁蓉(Herba Cistanches)、鹿角胶(Deerhorn Glue)、枸杞子(Fructus Lycii)、巴戟天(Morinda officinalis)、炒枣仁(Semen Ziziphi Spinosae)、远志(Radix Polygalae)、菖蒲(Rhizoma Acori Tatarinowii)、五味子(Fructus Schisandae chinensis)、麦冬(Ophiopogon japonicus (L. f.) Ker-Gawl.)、炙甘草(Radix Glycyrrhizae)、制首乌(Radix Polygoni Multiflori)	40	补脑合剂治疗老年痴呆精神行为障碍40例临床观察	2012	张中发. 补脑合剂治疗老年痴呆精神行为障碍40例临床观察[J]. 国医论坛, 2012, 27(4):28-29.
熟地(Radix Rehmanniae)、人参(Panax ginseng C. A. Mey.)、石菖蒲(Rhizoma Acori Tatarinowii)、茯苓(Poria cocos)、制半夏(Pinellia ternata(Thunb.)Breit.)、丹参(Radix Salviae Miltiorrhizae)、川芎(Rhizoma Chuanxiong)、柴胡(Radix Bupleuri)、香附(Cyperus rotundus L.)、远志(Radix Polygalae)、百合(Bulbus Lilii)、紫石英、枸杞子(Fructus Lycii)	17/13/30	补肾化瘀祛痰疏肝法治疗老年抑郁症30例疗效观察	2012	杜书萍. 补肾化瘀祛痰疏肝法治疗老年抑郁症30例疗效观察[J]. 国医论坛, 2012, 27(4):29-30.
药用熟地(Radix Rehmanniae)、鹿角胶(Deerhorn Glue)、肉苁蓉(Herba Cistanches)、枸杞子(Fructus Lycii)、炒枣仁(Semen Ziziphi Spinosae)、巴戟天(Morinda officinalis)、远志(Radix Polygalae)、五味子(Fructus Schisandae chinensis)、菖蒲(Rhizoma Acori Tatarinowii)、麦冬(Ophiopogon japonicus (L. f.) Ker-Gawl.)、制首乌(Radix Polygoni Multiflori)、炙甘草(Radix Glycyrrhizae)	30	补脑合剂治疗老年痴呆精神行为障碍临床观察	2012	牛凤英. 补脑合剂治疗老年痴呆精神行为障碍临床观察[J]. 中国保健营养月刊, 2012, 22(9):3997-3998.
熟地(Radix Rehmanniae)、山药(Rhizoma Dioscoreae)、制首乌(Radix Polygoni Multiflori)、杜仲(Eucommia ulmoides)、鹿角胶(Deerhorn Glue)、石菖蒲(Rhizoma Acori Tatarinowii)、茯苓(Poria cocos)、陈皮(Pericarpium Citri Reticulatae)、胆南星(Arisaema Cum Bile)、清半夏(Pinellia ternata(Thunb.)Breit.)、丹参(Radix Salviae Miltiorrhizae)、川芎(Rhizoma Chuanxiong)、柴胡(Radix Bupleuri)	28/12/40	补肾化痰祛瘀法治疗老年痴呆40例疗效观察	2010	李晓辉. 补肾化痰祛瘀法治疗老年痴呆40例疗效观察[J]. 国医论坛, 2010, 25(3):31-31.
丹参(Radix Salviae Miltiorrhizae)、川芎(Rhizoma Chuanxiong)、山药(Rhizoma Dioscoreae)、熟地(Radix Rehmanniae)、鹿角胶(Deerhorn Glue)、枸杞(Fructus Lycii)、牛膝(Achyranthes bidentata)、菟丝子(Semen Cuscutae)、山萸肉(Fructus Corni)	20	补肾活血法治疗老年性痴呆临床研究	2013	王恩龙. 补肾活血法治疗老年性痴呆临床研究[J]. 辽宁中医杂志, 2013(9):1867-1868.
山茱萸(Fructus Corni)、黄精(Polygonatum sibiricum Delar. ex Redoute)、益智仁(Sharpleaf Galangal Fruit)、怀牛膝(Achyranthes bidentata)、水蛭(Hirudo)、丹参(Radix Salviae Miltiorrhizae)、川芎(Rhizoma Chuanxiong)、白芷(Angelica dahurica)、赤芍(Radix Paeoniae Rubra)、菖蒲(Rhizoma Acori Tatarinowii)、天竺黄(Bambusa textilis McClure)、郁金(Radix Curcumae)	12	补肾活血化痰法治疗老年脑病12例	2012	韩玉香, 于福志. 补肾活血化痰法治疗老年脑病12例[J]. 中医研究, 2012, 25(9):30-31.
益智仁(Sharpleaf Galangal Fruit)、黄芪(Radix Astragali)、熟地黄(Radix Rehmanniae)、山茱萸(Fructus Corni)、枸杞子(Fructus Lycii)、川芎(Rhizoma Chuanxiong)、石菖蒲(Rhizoma Acori Tatarinowii)、合欢(Albizia julibrissin Durazz.)	30/5/35	补肾活血化瘀法治疗老年性痴呆患者35例	2010	赵玉敏, 韩寿英, 徐永忠. 补肾活血化瘀法治疗老年性痴呆患者35例[J]. 中国医药指南, 2010, 08(19):272-273.
何首乌(Radix Polygoni Multiflori)、黄芪(Radix Astragali)、泽泻(Rhizoma Alismatis)、菟丝子(Semen Cuscutae)、山茱萸(Fructus Corni)、黄精(Polygonatum sibiricum Delar. ex Redoute)、葛根(Radix Puerariae)、菖蒲(Rhizoma Acori Tatarinowii)、茯苓(Poria cocos)、川芎(Rhizoma Chuanxiong)、陈皮(Pericarpium Citri Reticulatae)、桃仁(Juglans regia)、远志(Radix Polygalae)、甘草(Radix Glycyrrhizae)	43	补肾活血化瘀法治疗老年性痴呆症的疗效观察	2010	赵振, 项颗, 孙莉. 补肾活血化瘀法治疗老年性痴呆症的疗效观察[J]. 中外医疗, 2010, 29(35):94-94.
制附片(Aconitum carmichaeli)、黄芪(Radix Astragali)、仙茅(Curculigo orchioides)、淫羊藿(Herba Epimedii)、巴戟天(Morinda officinalis)、制远志(Radix Polygalae)、益智仁(Sharpleaf Galangal Fruit)、石菖蒲(Rhizoma Acori Tatarinowii)、山茱萸(Fructus Corni)、丹参(Radix Salviae Miltiorrhizae)	46/34/80	补肾开窍益智方辨证治疗老年痴呆临床观察	2010	沈世豪. 补肾开窍益智方辨证治疗老年痴呆临床观察[J]. 辽宁中医杂志, 2010(s1):186-187.
黄芪(Radix Astragali)、制何首乌(Radix Polygoni Multiflori)、补骨脂(Psoralea corylifolia)、肉苁蓉(Herba Cistanches)、益智仁(Sharpleaf Galangal Fruit)、石菖蒲(Rhizoma Acori Tatarinowii)、郁金(Radix Curcumae)、丹参(Radix Salviae Miltiorrhizae)、川芎(Rhizoma Chuanxiong)、枸杞子(Fructus Lycii)、法半夏(Pinellia ternata(Thunb.)Breit.)、水蛭(Hirudo)、炙甘草(Radix Glycyrrhizae)	14	补肾祛痰化瘀复方治疗肾虚痰瘀型老年痴呆临床观察	2011	陈璐, 陈民, 刘兆崇. 补肾祛痰化瘀复方治疗肾虚痰瘀型老年痴呆临床观察[J]. 辽宁中医药大学学报, 2011(7):190-191.
鹿角胶(Deerhorn Glue)、龟板胶、紫河车(Dried Human Placenta)、熟地(Radix Rehmanniae)、制首乌(Radix Polygoni Multiflori)、枸杞子(Fructus Lycii)、山茱萸(Fructus Corni)、白术(Atractylodes macrocephala Koidz.)、当归(Radix Angelicae Sinensis)、山药(Rhizoma Dioscoreae)、石菖蒲(Rhizoma Acori Tatarinowii)、远志(Radix Polygalae)	14/16/30	补肾填精方加减治疗老年痴呆症30例	2012	刘进进. 补肾填精方加减治疗老年痴呆症30例[J]. 湖北中医杂志, 2012, 34(5):62-62.
枸杞子(Fructus Lycii)、肉苁蓉(Herba Cistanches)、茯苓(Poria cocos)、黄精(Polygonatum sibiricum Delar. ex Redoute)、黄芪(Radix Astragali)	60	补肾益精方治疗老年痴呆患者的护理	2012	周妍. 补肾益精方治疗老年痴呆患者的护理[J]. 内蒙古中医药, 2012, 31(19):174-175.
生黄芪(Radix Astragali)、生牡蛎(Concha Ostreae)、生龙骨、熟地黄(Radix Rehmanniae)、黄精(Polygonatum sibiricum Delar. ex Redoute)、丹参(Radix Salviae Miltiorrhizae)、菟丝子(Semen Cuscutae)、川芎(Rhizoma Chuanxiong)、石菖蒲(Rhizoma Acori Tatarinowii)、远志(Radix Polygalae)、怀牛膝(Achyranthes bidentata)、制胆星	20/15/35	补肾益脑方治疗老年性痴呆35例疗效观察	2016	朱俊新, 徐慧平, 叶杨. 补肾益脑方治疗老年性痴呆35例疗效观察[J]. 海南医学, 2016, 27(6).
熟地(Radix Rehmanniae)、生地(Radix Rehmanniae)、怀山药(Rhizoma Dioscoreae)、茯苓(Poria cocos)、川芎(Rhizoma Chuanxiong)、山茱萸(Fructus Corni)、丹皮(Cortex Moutan)	28/12/40	补肾益髓醒脑胶囊治疗血管性痴呆40例	2007	王立军, 李倜, 张雅丽,等. 补肾益髓醒脑胶囊治疗血管性痴呆40例[J]. 中国中医药科技, 2007, 14(1):12-12.
熟地(Radix Rehmanniae)、淫羊藿(Herba Epimedii)、枸杞子(Fructus Lycii)、制何首乌(Radix Polygoni Multiflori)、肉苁蓉(Herba Cistanches)、赤芍(Radix Paeoniae Rubra)、益智仁(Sharpleaf Galangal Fruit)、牛脊髓、补骨脂(Psoralea corylifolia)、丹参(Radix Salviae Miltiorrhizae)、川芎(Rhizoma Chuanxiong)、石菖蒲(Rhizoma Acori Tatarinowii)、远志(Radix Polygalae)、炙甘草(Radix Glycyrrhizae)	32/33/65	补肾益智汤辅助治疗肾虚痰瘀型老年痴呆症63例	2016	何鲜艳, 高晓峰, 张治华,等. 补肾益智汤辅助治疗肾虚痰瘀型老年痴呆症63例[J]. 浙江中医杂志, 2016, 51(5):348-348.
生黄芪(Radix Astragali)、当归(Radix Angelicae Sinensis)、地龙(Pheretima)、川芎(Rhizoma Chuanxiong)、桃仁(Juglans regia)、红花(Flos Carthami)、赤芍(Radix Paeoniae Rubra)	19/16/35	补阳还五汤加减治疗老年痴呆症35例临床观察	2013	何红玲, 周如明. 补阳还五汤加减治疗老年痴呆症35例临床观察[J]. 浙江中医药大学学报, 2013(6):723-724.
制首乌(Radix Polygoni Multiflori)、黄精(Polygonatum sibiricum Delar. ex Redoute)、赤芍(Radix Paeoniae Rubra)、生黄芪(Radix Astragali)、川芎(Rhizoma Chuanxiong)、地龙(Pheretima)、桃仁(Juglans regia)、红花(Flos Carthami)、当归尾(Radix Angelicae Sinensis)	8/5/13	补阳还五汤治疗老年性痴呆临床观察13例	2011	陈立红. 补阳还五汤治疗老年性痴呆临床观察13例[J]. 中国民族民间医药, 2011, 20(15):102-103.
黄芪(Radix Astragali)、水蛭(Hirudo)、熟地(Radix Rehmanniae)、枸杞子(Fructus Lycii)、丹参(Radix Salviae Miltiorrhizae)、菟丝子(Semen Cuscutae)、川芎(Rhizoma Chuanxiong)、石菖蒲(Rhizoma Acori Tatarinowii)、砂仁(Fructus Amomi)、黄精(Polygonatum sibiricum Delar. ex Redoute)、桑寄生(Taxillus chinensis)、益智仁(Sharpleaf Galangal Fruit)、续断(Dipsacus asperoides)	22/25/47	补元化浊健脑方治疗老年性痴呆肾虚血瘀型临床研究	2015	张兴博, 梁健芬, 郭旭堂. 补元化浊健脑方治疗老年性痴呆肾虚血瘀型临床研究[J]. 实用中医药杂志, 2015(3):175-176.
人参(Panax ginseng C. A. Mey.)、何首乌(Radix Polygoni Multiflori)、仙灵脾、地龙(Pheretima)、川芎(Rhizoma Chuanxiong)、益智仁(Sharpleaf Galangal Fruit)、生神曲	36	参龙汤治疗老年血管性痴呆的临床研究	2007	陈利平, 王发渭, 贾建军,等. 参龙汤治疗老年血管性痴呆的临床研究[J]. 解放军医学杂志, 2007, 32(8):866-868.
西洋参(Panax quinquefolium L.)、何首乌(Radix Polygoni Multiflori)、川芎(Rhizoma Chuanxiong)、乌梢蛇(Zaocys dhumnades(Cantor))、淫羊藿(Herba Epimedii)	18/14/32	参芎胶囊治疗老年痴呆64例临床疗效观察	2015	刘桑. 参芎胶囊治疗老年痴呆64例临床疗效观察[J]. 中国现代医药杂志, 2015(9):68-69.
陈皮(Pericarpium Citri Reticulatae)、茯苓(Poria cocos)、半夏(Pinellia ternata(Thunb.)Breit.)、枳实(Fructus Aurantii Immaturus)、竹茹(Caulis Bambusae in Taenia)、胆南星(Arisaema Cum Bile)、石菖蒲(Rhizoma Acori Tatarinowii)、人参(Panax ginseng C. A. Mey.)、当归(Radix Angelicae Sinensis)、川芎(Rhizoma Chuanxiong)、桃仁(Juglans regia)、红花(Flos Carthami)、赤芍(Radix Paeoniae Rubra)、水蛭(Hirudo)、何首乌(Radix Polygoni Multiflori)、枸杞子(Fructus Lyc…	25/5/30	涤痰化瘀补肾益髓法治疗血管性痴呆30例	2011	常明华. 涤痰化瘀补肾益髓法治疗血管性痴呆30例[J]. 中国民间疗法, 2011, 19(6):38-38.
桃仁(Juglans regia)、大黄(Radix et Rhizoma Rhei)、水蛭(Hirudo)、虻虫(Tabanus bivittatus Matsumura)、党参(Radix Codonopsis)、黄芪(Radix Astragali)、茯苓(Poria cocos)、当归(Radix Angelicae Sinensis)、炙甘草(Radix Glycyrrhizae)	14/16/30	抵当汤加减治疗老年性痴呆疗效观察	2012	王康锋, 张立娟. 抵当汤加减治疗老年性痴呆疗效观察[J]. 中国中医药信息杂志, 2012, 19(10):74-75.
酒大黄(Radix et Rhizoma Rhei)、桃仁(Juglans regia)、水蛭(Hirudo)、虻虫(Tabanus bivittatus Matsumura)	29/11/40	抵当汤治疗早期老年痴呆临床研究	2016	李纪乐. 抵当汤治疗早期老年痴呆临床研究[J]. 河南中医, 2016, 36(8):1318-1320.
熟地(Radix Rehmanniae)、山茱萸(Fructus Corni)、广巴戟(Morinda officinalis)、肉苁蓉(Herba Cistanches)、石斛(Herba Dendrobll)、麦冬(Ophiopogon japonicus (L. f.) Ker-Gawl.)、茯苓(Poria cocos)、远志(Radix Polygalae)、当归(Radix Angelicae Sinensis)、附子(Aconitum carmichaeli)、石菖蒲(Rhizoma Acori Tatarinowii)、党参(Radix Codonopsis)、丹参(Radix Salviae Miltiorrhizae)、五味子(Fructus Schisandae chinensis)	15/3/18	地黄饮子治疗老年痴呆症18例	2011	李枝朝. 地黄饮子治疗老年痴呆症18例[J]. 四川中医, 2011(2):89-89.
桃仁(Juglans regia)、红花(Flos Carthami)、当归(Radix Angelicae Sinensis)、生地(Radix Rehmanniae)、川芎(Rhizoma Chuanxiong)、赤芍(Radix Paeoniae Rubra)、柴胡(Radix Bupleuri)、枳壳(Fructus Aurantii)、甘草(Radix Glycyrrhizae)、半夏(Pinellia ternata(Thunb.)Breit.)、苏子(Perilla frutescens (l.) Britt.)、香附(Cyperus rotundus L.)、青皮(Citrus reticulata Blanco)、菖蒲(Rhizoma Acori Tatarinowii)、郁金(Radix Curcumae)	40/10/50	癫狂梦醒汤加减治疗老年性痴呆50例	2009	孔令海, 孙金华. 癫狂梦醒汤加减治疗老年性痴呆50例[J]. 中国医药导报, 2009, 6(16):131-131.
丹参(Radix Salviae Miltiorrhizae)，三七(Panax notoginseng)，冰片(Borneolum Syntheticum)	12/18/30	复方丹参片治疗老年性痴呆的临床疗效观察	2015	毛晔旦. 复方丹参片治疗老年性痴呆的临床疗效观察[J]. 海峡药学, 2015(2):136-137.
党参(Radix Codonopsis)、杞果(Fructus Lycii)、何首乌(Radix Polygoni Multiflori)、茯苓(Poria cocos)、生山楂(Crataegus pinnatifida)、石菖蒲(Rhizoma Acori Tatarinowii)	56/24/80	固本健脾方治疗老年血管性痴呆80例临床观察	2008	瓮恒, 马作峰. 固本健脾方治疗老年血管性痴呆80例临床观察[J]. 中国医药指南, 2008, 6(24):308-309.
龟板、鹿角(Cornu Cervi)、枸杞子(Fructus Lycii)、党参(Radix Codonopsis)、白术(Atractylodes macrocephala Koidz.)、茯神、薏苡仁(Coix lachryma-jobi)、石菖蒲(Rhizoma Acori Tatarinowii)、远志(Radix Polygalae)、益智仁(Sharpleaf Galangal Fruit)、何首乌(Radix Polygoni Multiflori)、田大云	20/6/26	龟鹿二仙膏加味治疗老年性记忆障碍症26例	2010	黄增强. 龟鹿二仙膏加味治疗老年性记忆障碍症26例[J]. 中国民间疗法, 2010, 18(11):38-38.
黄芪(Radix Astragali)、水蛭(Hirudo)、桃仁(Juglans regia)、红花(Flos Carthami)、凌霄花(Campsis grandiflora)、泽泻(Rhizoma Alismatis)、石菖蒲(Rhizoma Acori Tatarinowii)、胆南星(Arisaema Cum Bile)	127/148/275	黄芪益脑宁治疗老年痴呆症的临床研究	2008	马玉斌, 孙立新. 黄芪益脑宁治疗老年痴呆症的临床研究[J]. 数理医药学杂志, 2008, 21(4):429-430.
熟地(Radix Rehmanniae)、山茱萸(Fructus Corni)、石菖蒲(Rhizoma Acori Tatarinowii)、远志(Radix Polygalae)、灵芝(Ganoderma lucidum (Leyss. ex Fr.) Karst.)、制首乌(Radix Polygoni Multiflori)、枸妃子、肉苁蓉(Herba Cistanches)、淫羊藿(Herba Epimedii)、丹参(Radix Salviae Miltiorrhizae)、地龙(Pheretima)、天麻(Rhizoma Gastrodiae)等	14/6/20	活脑方治疗阿尔茨海默病肾虚髓减证临床研究	2008	陈岩, 袁勇. 活脑方治疗阿尔茨海默病肾虚髓减证临床研究[J]. 山东医药, 2008, 48(32):81-82.
黄芪(Radix Astragali)、党参(Radix Codonopsis)、茯苓(Poria cocos)、白术(Atractylodes macrocephala Koidz.)、当归(Radix Angelicae Sinensis)、川芎(Rhizoma Chuanxiong)、赤芍(Radix Paeoniae Rubra)、鹿角胶(Deerhorn Glue)、龟板胶、菖蒲(Rhizoma Acori Tatarinowii)、远志(Radix Polygalae)、熟地(Radix Rehmanniae)、菟丝子(Semen Cuscutae)、地龙(Pheretima)、陈皮(Pericarpium Citri Reticulatae)、升麻(Rhizoma Cimicifugae)	20/10/30	加味七福饮治疗老年痴呆30例临床观察	2012	贾海龙. 加味七福饮治疗老年痴呆30例临床观察[J]. 北方药学, 2012, 09(6):22-22.
枸杞子(Fructus Lycii)、熟地黄(Radix Rehmanniae)、山茱萸(Fructus Corni)、菟丝子(Semen Cuscutae)、益智仁(Sharpleaf Galangal Fruit)、何首乌(Radix Polygoni Multiflori)、茯苓(Poria cocos)、石菖蒲(Rhizoma Acori Tatarinowii)、桃仁(Juglans regia)	13/17/30	健脑通胶囊延缓老年痴呆发展临床观察	2013	苗琦, 王郁金. 健脑通胶囊延缓老年痴呆发展临床观察[J]. 吉林中医药, 2013, 33(10):1012-1012.
桃仁(Juglans regia)、石菖蒲(Rhizoma Acori Tatarinowii)、何首乌(Radix Polygoni Multiflori)、益智仁(Sharpleaf Galangal Fruit)、茯苓(Poria cocos)、菟丝子(Semen Cuscutae)、山茱萸(Fructus Corni)肉、地黄(Radix Rehmanniae)、枸杞(Fructus Lycii)	28/31/59	健脑通胶囊治疗老年痴呆临床观察	2016	李学杰, 曾进, 谭支支,等. 健脑通胶囊治疗老年痴呆临床观察[J]. 湖北中医药大学学报, 2016, 18(3):84-86.
紫河车(Dried Human Placenta)、龟板、杜仲(Eucommia ulmoides)、何首乌(Radix Polygoni Multiflori)、桃仁(Juglans regia)、红花(Flos Carthami)、当归(Radix Angelicae Sinensis)、天麻(Rhizoma Gastrodiae)、人参(Panax ginseng C. A. Mey.)、黄芪(Radix Astragali)、石菖蒲(Rhizoma Acori Tatarinowii)、羚羊角粉(Cornu Saigae Tataricae)、金线莲(Anectochilus roxburhii （Wall.） Lindl.)、白芍(Paeonia lactiflora)、柴胡(Radix Bupleuri)	60/36/96	健脑益智散治疗老年痴呆症96例	2009	林荣书. 健脑益智散治疗老年痴呆症96例[J]. 临床医药实践, 2009(14):1719-1719.
黄芪(Radix Astragali)、党参(Radix Codonopsis)、怀山药(Rhizoma Dioscoreae)、茯苓(Poria cocos)、扁豆(Dolichos lablab L.)、白术(Atractylodes macrocephala Koidz.)、甘草(Radix Glycyrrhizae)、大枣(Ziziphus jujuba Mill.)、枸杞子(Fructus Lycii)、熟地黄(Radix Rehmanniae)、黄精(Polygonatum sibiricum Delar. ex Redoute)、蚕蛾(Silk moth)、淫羊藿(Herba Epimedii)、当归(Radix Angelicae Sinensis)、山楂(Crataegus pinnatifida)、刺五加(Acanthopanax senticosus (Rupr. …	20	健脾益气、滋阴益肾法治疗老年痴呆症临床观察	2013	何静. 健脾益气、滋阴益肾法治疗老年痴呆症临床观察[J]. 辽宁中医药大学学报, 2013(5):178-179.
半夏(Pinellia ternata(Thunb.)Breit.)、橘红(Exocarpium Citri Rubrum)、枳壳(Fructus Aurantii)、红花(Flos Carthami)、远志(Radix Polygalae)、石菖蒲(Rhizoma Acori Tatarinowii)、丹参(Radix Salviae Miltiorrhizae)、山楂(Crataegus pinnatifida)、荷叶(Nelumbo nucifera)、莱菔子(Raphanus sativus L.)、川芎(Rhizoma Chuanxiong)	36/24/60	降脂益智颗粒对轻度认知功能障碍患者蒙特利尔认知评估量表的影响	2016	李欣, 王峻. 降脂益智颗粒对轻度认知功能障碍患者蒙特利尔认知评估量表的影响[J]. 浙江中医杂志, 2016, 51(2):98-99.
姜半夏(Pinellia ternata(Thunb.)Breit.)、橘红(Exocarpium Citri Rubrum)、枳壳(Fructus Aurantii)、川芎(Rhizoma Chuanxiong)、红花(Flos Carthami)、远志(Radix Polygalae)、石菖蒲(Rhizoma Acori Tatarinowii)、丹参(Radix Salviae Miltiorrhizae)、生山楂(Crataegus pinnatifida)、荷叶(Nelumbo nucifera)、炒莱菔子(Raphanus sativus L.)	45/15/60	降脂益智颗粒治疗痰瘀型轻度认知功能障碍临床研究	2012	王峻, 张华, 赵东杰. 降脂益智颗粒治疗痰瘀型轻度认知功能障碍临床研究[J]. 中华中医药学刊, 2012(11):2538-2539.
黄连(Rhizoma Coptidis)、肉桂(Cinnamomum cassia)、远志(Radix Polygalae)	15/15/30	交泰丸对老年性痴呆心肾不交证患者认知能力及血清Aβ水平的影响	2015	李秀玲, 刘亚芬, 孙莉. 交泰丸对老年性痴呆心肾不交证患者认知能力及血清Aβ水平的影响[J]. 中国中医药现代远程教育, 2015, 13(24):12-14.
黄芪(Radix Astragali)、山萸肉(Fructus Corni)、杞子(Fructus Lycii)、熟地(Radix Rehmanniae)、当归(Radix Angelicae Sinensis)、川芎(Rhizoma Chuanxiong)、地龙(Pheretima)、郁金(Radix Curcumae)、石菖蒲(Rhizoma Acori Tatarinowii)、胆南星(Arisaema Cum Bile)、益智仁(Sharpleaf Galangal Fruit)、白芍(Paeonia lactiflora)、生大黄(Radix et Rhizoma Rhei)、水蛭(Hirudo)、泽泻(Rhizoma Alismatis)	25/8/33	解毒益智汤加激光鼻腔内照射治疗血管性痴呆33例疗效观察	2007	黄颖, 覃秀英. 解毒益智汤加激光鼻腔内照射治疗血管性痴呆33例疗效观察[J]. 浙江中医杂志, 2007, 42(10):586-586.
远志(Radix Polygalae)、山药(Rhizoma Dioscoreae)、山茱萸(Fructus Corni)、牛膝(Achyranthes bidentata)、茯苓(Poria cocos)、附子(Aconitum carmichaeli)、牡丹皮(Cortex Moutan)(Cortex Moutan)、肉苁蓉(Herba Cistanches)、桂枝(Cinnamomum cassia)、干地黄(Radix Rehmanniae)	45/33/78	金匮肾气丸加减治疗老年性痴呆的临床观察	2010	李杰. 金匮肾气丸加减治疗老年性痴呆的临床观察[J]. 中国医药指南, 2010, 08(29):268-269.
益智仁(Sharpleaf Galangal Fruit)、胆南星(Arisaema Cum Bile)、石菖蒲(Rhizoma Acori Tatarinowii)、山茱萸(Fructus Corni)、川芎(Rhizoma Chuanxiong)、菟丝子(Semen Cuscutae)、远志(Radix Polygalae)、生山楂(Crataegus pinnatifida)、沙苑子(Semen Astragali Complanati)、郁金(Radix Curcumae)、锁阳(Cynomorium songaricum)、丹参(Radix Salviae Miltiorrhizae)、水蛭(Hirudo)	41	卡巴拉汀持续及其联合体针、醒窍活血汤治疗老年痴呆的临床研究	2016	张学锋. 卡巴拉汀持续及其联合体针、醒窍活血汤治疗老年痴呆的临床研究[J]. 中华中医药学刊, 2016(2):428-430.
柏子仁(Semen Platycladi)、枸杞子(Fructus Lycii)、当归(Radix Angelicae Sinensis)、熟地黄(Radix Rehmanniae)、远志(Radix Polygalae)、川芎(Rhizoma Chuanxiong)、石菖蒲(Rhizoma Acori Tatarinowii)、水蛭(Hirudo)	23/27/50	老年痴呆病的发病机制及临床采用中西医结合药物治疗的效果	2016	高丽杰. 老年痴呆病的发病机制及临床采用中西医结合药物治疗的效果[J]. 中国医药指南, 2016, 14(34):162-162.
柏子仁(Semen Platycladi)、熟地黄(Radix Rehmanniae)、枸杞子(Fructus Lycii)、当归(Radix Angelicae Sinensis)、志远(Viola yedoensis)、川芎(Rhizoma Chuanxiong)、石菖蒲(Rhizoma Acori Tatarinowii)、水蛭(Hirudo)	24/26/50	老年痴呆病的发病机制及临床采用中西医结合药物治疗效果	2015	张馨娜, 卢宗艳, 赵颖. 老年痴呆病的发病机制及临床采用中西医结合药物治疗效果[J]. 世界最新医学信息文摘:连续型电子期刊, 2015, 15(A2):31-32.
制首乌(Radix Polygoni Multiflori)、熟地(Radix Rehmanniae)、枸杞(Fructus Lycii)、丹参(Radix Salviae Miltiorrhizae)、黄芪(Radix Astragali)、当归(Radix Angelicae Sinensis)、远志(Radix Polygalae)、柏子仁(Semen Platycladi)、石菖蒲(Rhizoma Acori Tatarinowii)、川芎(Rhizoma Chuanxiong)、甘草(Radix Glycyrrhizae)、三七(Panax notoginseng)	19/23/42	老年痴呆病的发病机制及临床采用中西医结合药物治疗治果分析	2016	李晓婷, 周静. 老年痴呆病的发病机制及临床采用中西医结合药物治疗治果分析[J]. 山东农业工程学院学报, 2016, 33(8):96-97.
水蛭(Hirudo)、熟地黄(Radix Rehmanniae)、川芎(Rhizoma Chuanxiong)、枸杞子(Fructus Lycii)、柏子仁(Semen Platycladi)、石菖蒲(Rhizoma Acori Tatarinowii)、远志(Radix Polygalae)、当归(Radix Angelicae Sinensis)	19/11/30	老年痴呆病的发病机制及临床药物治疗分析	2013	梁汉周, 梁雁, 黄波. 老年痴呆病的发病机制及临床药物治疗分析[J]. 当代医学, 2013(22):150-151.
枸杞子(Fructus Lycii)、熟地黄(Radix Rehmanniae)、柏子仁(Semen Platycladi)、川芎(Rhizoma Chuanxiong)、远志(Radix Polygalae)、石菖蒲(Rhizoma Acori Tatarinowii)、水蛙	25/15/40	老年痴呆病的发病机制及临床药物治疗研究	2016	祝常金. 老年痴呆病的发病机制及临床药物治疗研究[J]. 中国农村卫生, 2016(10):18-19.
水蛭(Hirudo)、川芎(Rhizoma Chuanxiong)、远志(Radix Polygalae)、石菖蒲(Rhizoma Acori Tatarinowii)、熟地黄(Radix Rehmanniae)、枸杞子(Fructus Lycii)、柏子仁(Semen Platycladi)、当归(Radix Angelicae Sinensis)	21/14/35	老年痴呆症的发病机制及临床药物治疗	2015	崔卫明. 老年痴呆症的发病机制及临床药物治疗[J]. 临床医药文献电子杂志, 2015, 19(19):3903-3903.
人参(Panax ginseng C. A. Mey.)、石菖蒲(Rhizoma Acori Tatarinowii)、茯苓(Poria cocos)、远志(Radix Polygalae)、丹参(Radix Salviae Miltiorrhizae)、巴戟天(Morinda officinalis)	46/44/90	老年性痴呆中西医结合防治研究	2016	郑然, 邹勇. 老年性痴呆中西医结合防治研究[J]. 中国中医药现代远程教育, 2016, 14(16):56-58.
熟地黄(Radix Rehmanniae)、山萸肉(Fructus Corni)、山药(Rhizoma Dioscoreae)、泽泻(Rhizoma Alismatis)、牡丹皮(Cortex Moutan)(Cortex Moutan)、白茯苓(Poria cocos)	30/10/40	六味地黄丸辅佐治疗延缓老年痴呆症40例观察	2014	李君玲, 周恒, 林丽娜. 六味地黄丸辅佐治疗延缓老年痴呆症40例观察[J]. 中西医结合心脑血管病杂志, 2014, 12(1):117-118.
熟地黄(Radix Rehmanniae)、山萸肉(Fructus Corni)、山药(Rhizoma Dioscoreae)、泽泻(Rhizoma Alismatis)、牡丹皮(Cortex Moutan)(Cortex Moutan)、白茯苓(Poria cocos)	32/23/55	六味地黄丸和奥氮平对老年痴呆精神行为症状改善作用的比较	2013	沈燕萍. 六味地黄丸和奥氮平对老年痴呆精神行为症状改善作用的比较[J]. 中医药导报, 2013, 19(12):39-41.
熟地黄(Radix Rehmanniae)、山萸肉(Fructus Corni)、山药(Rhizoma Dioscoreae)、泽泻(Rhizoma Alismatis)、牡丹皮(Cortex Moutan)(Cortex Moutan)、白茯苓(Poria cocos)	16/14/30	六味地黄丸和奥氮平对老年痴呆精神行为症状改善作用的对比研究	2015	付英杰. 六味地黄丸和奥氮平对老年痴呆精神行为症状改善作用的对比研究[J]. 中国现代医药杂志, 2015(7):55-56.
熟地黄(Radix Rehmanniae)、山萸肉(Fructus Corni)、山药(Rhizoma Dioscoreae)、泽泻(Rhizoma Alismatis)、牡丹皮(Cortex Moutan)(Cortex Moutan)、白茯苓(Poria cocos)	21/14/35	六味地黄丸联合盐酸多奈哌齐治疗肾阴虚型老年痴呆症临床观察	2017	陈静, 蒋娟莉, 袁明勇,等. 六味地黄丸联合盐酸多奈哌齐治疗肾阴虚型老年痴呆症临床观察[J]. 临床合理用药杂志, 2017, 10(1):64-65.
熟地黄(Radix Rehmanniae)、山萸肉(Fructus Corni)、山药(Rhizoma Dioscoreae)、泽泻(Rhizoma Alismatis)、牡丹皮(Cortex Moutan)(Cortex Moutan)、白茯苓(Poria cocos)	36/18/54	六味地黄丸配合治疗老年痴呆症的临床研究	2012	张春梅. 六味地黄丸配合治疗老年痴呆症的临床研究[J]. 中医临床研究, 2012(19):88-88.
熟地黄(Radix Rehmanniae)、山萸肉(Fructus Corni)、山药(Rhizoma Dioscoreae)、泽泻(Rhizoma Alismatis)、牡丹皮(Cortex Moutan)(Cortex Moutan)、白茯苓(Poria cocos)	37/13/50	六味地黄丸延缓老年痴呆症50例疗效观察	2007	卿照前. 六味地黄丸延缓老年痴呆症50例疗效观察[J]. 中国中医药科技, 2007, 14(5):373-374.
熟地黄(Radix Rehmanniae)、山萸肉(Fructus Corni)、山药(Rhizoma Dioscoreae)、泽泻(Rhizoma Alismatis)、牡丹皮(Cortex Moutan)(Cortex Moutan)、白茯苓(Poria cocos)	31/20/51	六味地黄丸在老年痴呆症辅佐治疗中的应用及效果	2015	杜国亮, 李虎, 刘冬,等. 六味地黄丸在老年痴呆症辅佐治疗中的应用及效果[J]. 河北医药, 2015, 37(11):1661-1663.
半夏(Pinellia ternata(Thunb.)Breit.)、石菖蒲(Rhizoma Acori Tatarinowii)、陈皮(Pericarpium Citri Reticulatae)、何首乌(Radix Polygoni Multiflori)、枸杞子(Fructus Lycii)、赤芍(Radix Paeoniae Rubra)、丹参(Radix Salviae Miltiorrhizae)、川芎(Rhizoma Chuanxiong)、山楂(Crataegus pinnatifida)、神曲、麦芽(Hordeum vulgare)、白术(Atractylodes macrocephala Koidz.)、茯苓(Poria cocos)、甘草(Radix Glycyrrhizae)	18/22/40	祛痰化瘀方治疗痰瘀互阻型老年性痴呆40例	2016	罗娟, 于铁, 张淼. 祛痰化瘀方治疗痰瘀互阻型老年性痴呆40例[J]. 中国中医药现代远程教育, 2016, 14(22):81-83.
人参(Panax ginseng C. A. Mey.)、山药(Rhizoma Dioscoreae)、当归(Radix Angelicae Sinensis)、茯苓(Poria cocos)、肉苁蓉(Herba Cistanches)、桑椹(Morus alba)、珍珠母(Concha Margaritifera)、熟地黄(Radix Rehmanniae)、酸枣仁(Semen Ziziphi Spinosae)、川芎(Rhizoma Chuanxiong)、生龙齿、黄芩(Scutellaria baicalensis)、陈皮(Pericarpium Citri Reticulatae)、核桃仁(Juglans regia)	26/23/49	人参补精安神方联合盐酸美金刚片治疗老年痴呆的应用及效果	2016	李鸿萱, 王倩, 刘丽敏,等. 人参补精安神方联合盐酸美金刚片治疗老年痴呆的应用及效果[J]. 河北医药, 2016, 38(21):3315-3317.
人参(Panax ginseng C. A. Mey.) 槟榔(Areca catechu) 沉香(Aquilaria sinensis(Lour.)Gilg) 天台乌药(Lindera aggregate)	9/5/14	四磨汤联合酪酸梭菌活菌散对阿尔茨海默病患者认知功能的影响	2014	王晓东, 李先强. 四磨汤联合酪酸梭菌活菌散对阿尔茨海默病患者认知功能的影响[J]. 中医学报, 2014(12):1803-1805.
熟地黄(Radix Rehmanniae)、水蛭(Hirudo)、川穹(Rhizoma Chuanxiong)、枸杞子(Fructus Lycii)、肉苁蓉(Herba Cistanches)、柏子仁(Semen Platycladi)、远志(Radix Polygalae)、当归(Radix Angelicae Sinensis)、石菖蒲(Rhizoma Acori Tatarinowii)、制南星、僵蚕(Bombyx Batryticatus)、郁金(Radix Curcumae)	29/23/52	探讨老年痴呆病的发病机制及临床采用中西医结合药物治疗效果	2016	吕红霞, 王立岩. 探讨老年痴呆病的发病机制及临床采用中西医结合药物治疗效果[J]. 世界最新医学信息文摘:连续型电子期刊, 2016, 16(3).
熟地黄(Radix Rehmanniae)、水蛭(Hirudo)、川穹(Rhizoma Chuanxiong)、枸杞子(Fructus Lycii)、肉苁蓉(Herba Cistanches)、柏子仁(Semen Platycladi)、远志(Radix Polygalae)、当归(Radix Angelicae Sinensis)、石菖蒲(Rhizoma Acori Tatarinowii)、制南星、僵蚕(Bombyx Batryticatus)、郁金(Radix Curcumae)	50	探讨老年痴呆的发病机制及临床采用中西医结合药物治疗效果	2016	刘洪艳. 探讨老年痴呆的发病机制及临床采用中西医结合药物治疗效果[J]. 世界最新医学信息文摘:电子版, 2016, 16(36).
当归(Radix Angelicae Sinensis)、柏子仁(Semen Platycladi)、枸杞子(Fructus Lycii)、熟地黄(Radix Rehmanniae)、远志(Radix Polygalae)、石菖蒲(Rhizoma Acori Tatarinowii)、川芎(Rhizoma Chuanxiong)、水蛭(Hirudo)	50	探讨老年痴呆症的发病机制及临床采用中西医结合药物治疗效果	2016	苗阳, 王丽, MIAOYang,等. 探讨老年痴呆症的发病机制及临床采用中西医结合药物治疗效果[J]. 中国继续医学教育, 2016, 8(2):193-194.
熟地黄(Radix Rehmanniae)、山萸肉(Fructus Corni)、山药(Rhizoma Dioscoreae)、泽泻(Rhizoma Alismatis)、牡丹皮(Cortex Moutan)(Cortex Moutan)、白茯苓(Poria cocos)	40	探讨六味地黄丸配合治疗老年痴呆临床效果	2014	晁婧媛, 朱爱琴. 探讨六味地黄丸配合治疗老年痴呆临床效果[J]. 大家健康旬刊, 2014(4):39-40.
黄芪(Radix Astragali)、益智仁(Sharpleaf Galangal Fruit)、三七(Panax notoginseng)、何首乌(Radix Polygoni Multiflori)、石菖蒲(Rhizoma Acori Tatarinowii)、川芎(Rhizoma Chuanxiong)、川牛膝(Achyranthes bidentata)、绞股蓝(Gynostemma pentaphyllum)	12/8/20	温脾益神汤治疗老年痴呆20例	2009	李鹏, 吴林. 温脾益神汤治疗老年痴呆20例[J]. 新中医, 2009(10):80-80.
黄芪(Radix Astragali)、枸杞子(Fructus Lycii)、制何首乌(Radix Polygoni Multiflori)、益智仁(Sharpleaf Galangal Fruit)、丹参(Radix Salviae Miltiorrhizae)、补骨脂(Psoralea corylifolia)、肉苁蓉(Herba Cistanches)、石菖蒲(Rhizoma Acori Tatarinowii)、川芎(Rhizoma Chuanxiong)、法半夏(Pinellia ternata(Thunb.)Breit.)、郁金(Radix Curcumae)、炙甘草(Radix Glycyrrhizae)	17/14/31	温阳益气化痰法联合石杉碱甲治疗老年痴呆肾虚痰瘀证的疗效观察	2016	王健, 张于刚, 宋艳丽,等. 温阳益气化痰法联合石杉碱甲治疗老年痴呆肾虚痰瘀证的疗效观察[J]. 中医药导报, 2016(16):67-69.
鹿角胶(Deerhorn Glue)、龟板胶、紫河车(Dried Human Placenta)、首乌(Radix Polygoni Multiflori)、枸杞子(Fructus Lycii)、菟丝子(Semen Cuscutae)、生地(Radix Rehmanniae)、熟地(Radix Rehmanniae)、巴戟天(Morinda officinalis)、田大云、远志(Radix Polygalae)、菖蒲(Rhizoma Acori Tatarinowii)、益智仁(Sharpleaf Galangal Fruit)、云苓、薏苡仁(Coix lachryma-jobi)	100	醒脑开窍及补肾益髓法治疗老年痴呆100例	2010	张玲, 韩运潮. 醒脑开窍及补肾益髓法治疗老年痴呆100例[J]. 中国民康医学, 2010, 22(22):2863-2863.
党参(Radix Codonopsis)、枸杞(Fructus Lycii)、黄精(Polygonatum sibiricum Delar. ex Redoute)、山药(Rhizoma Dioscoreae)、黄芪(Radix Astragali)、怀牛膝(Achyranthes bidentata)、龟甲胶、丹参(Radix Salviae Miltiorrhizae)、山萸肉(Fructus Corni)、巴戟天(Morinda officinalis)、制首乌(Radix Polygoni Multiflori)、熟地(Radix Rehmanniae)、肉苁蓉(Herba Cistanches)、石菖蒲(Rhizoma Acori Tatarinowii)、远志(Radix Polygalae)、甘草(Radix Glycyrrhizae)	30	穴位埋线配合补肾益髓汤治疗老年性痴呆的临床研究	2013	赵先彬, 杨晓燕, 陈妍,等. 穴位埋线配合补肾益髓汤治疗老年性痴呆的临床研究[J]. 新疆中医药, 2013, 31(1):32-34.
黄芪(Radix Astragali)、当归(Radix Angelicae Sinensis)、何首乌(Radix Polygoni Multiflori)、熟地黄(Radix Rehmanniae)、枸杞子(Fructus Lycii)、山茱萸(Fructus Corni)、丹参(Radix Salviae Miltiorrhizae)、川穹(Rhizoma Chuanxiong)、穿山甲(Manis pentadactyla Linnaeus)、桃仁(Juglans regia)、红花(Flos Carthami)、石菖蒲(Rhizoma Acori Tatarinowii)、郁金(Radix Curcumae)、陈皮(Pericarpium Citri Reticulatae)、天麻(Rhizoma Gastrodiae)、地龙(Pheretima)、钩藤(Uncaria rhy…	18/12/30	益脑通络汤剂治疗老年痴呆症30例临床观察	2012	王素君. 益脑通络汤剂治疗老年痴呆症30例临床观察[J]. 中医临床研究, 2012, 04(7):104-104.
红参(Panax ginseng C. A. Mey.)、北芪(Radix Astragali)、熟地(Radix Rehmanniae)、鹿茸(Cornu Cervi Pantotrichum)、田七、陈皮(Pericarpium Citri Reticulatae)、葛根(Radix Puerariae)、黄柏(Cortex Phellodendri)、白芍(Paeonia lactiflora)、升麻(Rhizoma Cimicifugae)、炙甘草(Radix Glycyrrhizae)	17/13/30	益气聪明汤加减治疗老年性痴呆( 脾肾两虚型) 临床研究	2014	庞声航, 康宝仁. 益气聪明汤加减治疗老年性痴呆(脾肾两虚型)临床研究[J]. 辽宁中医杂志, 2014(5):967-969.
党参(Radix Codonopsis)、白术(Atractylodes macrocephala Koidz.)、黄芪(Radix Astragali)、何首乌(Radix Polygoni Multiflori)、熟地(Radix Rehmanniae)、骨碎补(Drynaria fortunei （Kunze） J. Sm.)、肉苁蓉(Herba Cistanches)、川芎(Rhizoma Chuanxiong)、益智仁(Sharpleaf Galangal Fruit)、枸杞子(Fructus Lycii)、山萸肉(Fructus Corni)、茯神、远志(Radix Polygalae)、当归(Radix Angelicae Sinensis)、郁金(Radix Curcumae)、丹参(Radix Salviae Miltiorrhizae)	30	益髓增智汤治疗血管性痴呆	2007	王彦华. 益髓增智汤治疗血管性痴呆[J]. 医药论坛杂志, 2007, 28(20):118-118.
熟地黄(Radix Rehmanniae)、巴戟天(Morinda officinalis)、肉苁蓉(Herba Cistanches)、石菖蒲(Rhizoma Acori Tatarinowii)、黄芪(Radix Astragali)、白术(Atractylodes macrocephala Koidz.)、川芎(Rhizoma Chuanxiong)、佛手(Fructus Citri Sarcodactylis)、郁金(Radix Curcumae)、红花(Flos Carthami)、泽泻(Rhizoma Alismatis)、龙眼肉(Dimocarpus longan)、当归(Radix Angelicae Sinensis)、酸枣仁(Semen Ziziphi Spinosae)	22/16/38	益智聪脑颗粒联合多奈哌齐片治疗老年痴呆临床研究	2013	邵静, 曹淑丽. 益智聪脑颗粒联合多奈哌齐片治疗老年痴呆临床研究[J]. 中医学报, 2013, 28(10):1558-1560.
生黄芪(Radix Astragali)、当归(Radix Angelicae Sinensis)、党参(Radix Codonopsis)、益智仁(Sharpleaf Galangal Fruit)、川芎(Rhizoma Chuanxiong)、桃仁(Juglans regia)、红花(Flos Carthami)、赤芍(Radix Paeoniae Rubra)、茯苓(Poria cocos)、胆南星(Arisaema Cum Bile)、远志(Radix Polygalae)、天麻(Rhizoma Gastrodiae)、鹿角胶(Deerhorn Glue)、水蛭(Hirudo)	22/18/40	益智汤治疗老年痴呆症临床观察	2014	张小平. 益智汤治疗老年痴呆症临床观察[J]. 湖北中医药大学学报, 2014, 16(1):81-82.
枸杞子(Fructus Lycii)、菟丝子(Semen Cuscutae)、鹿角霜(Cornu Cervi Degelatinatum)、山萸肉(Fructus Corni)、仙灵脾、巴戟天(Morinda officinalis)、天麻(Rhizoma Gastrodiae)、石菖蒲(Rhizoma Acori Tatarinowii)、胆南星(Arisaema Cum Bile)、党参(Radix Codonopsis)、黄芪(Radix Astragali)、川芎(Rhizoma Chuanxiong)、当归(Radix Angelicae Sinensis)	20/18/38	益智汤治疗血管性痴呆38例疗效观察	2009	李清丽, 张先茂. 益智汤治疗血管性痴呆38例疗效观察[J]. 社区医学杂志, 2009, 7(8):67-67.
黄芪(Radix Astragali)、益智仁(Sharpleaf Galangal Fruit)、山萸肉(Fructus Corni)、枸杞子(Fructus Lycii)、茯苓(Poria cocos)、丹参(Radix Salviae Miltiorrhizae)、仙灵脾、牛膝(Achyranthes bidentata)、地龙(Pheretima)、石菖蒲(Rhizoma Acori Tatarinowii)、生地(Radix Rehmanniae)、熟地(Radix Rehmanniae)、菟丝子(Semen Cuscutae)、女贞子(Ligustrum lucidum)、山药(Rhizoma Dioscoreae)、炒神曲、炒麦芽(Hordeum vulgare)、炒山楂(Crataegus pinnatifida)	47/11/58	益智醒脑汤配合针灸治疗痰瘀闭阻型老年痴呆症58例	2007	陈荣, 殷群, 路亚娥. 益智醒脑汤配合针灸治疗痰瘀闭阻型老年痴呆症58例[J]. 陕西中医, 2007, 28(6):670-671.
熟地(Radix Rehmanniae)、山茱萸(Fructus Corni)、黄芪(Radix Astragali)、益智仁(Sharpleaf Galangal Fruit)、鹿角胶(Deerhorn Glue)、远志(Radix Polygalae)、郁金(Radix Curcumae)、川穹(Rhizoma Chuanxiong)、当归(Radix Angelicae Sinensis)、酒大黄(Radix et Rhizoma Rhei)	57	益智治呆方联合吡拉西坦治疗老年痴呆症的临床研究	2015	赵翠霞, 阿衣努尔&#;木合买提巴克, 万智,等. 益智治呆方联合吡拉西坦治疗老年痴呆症的临床研究[J]. 中国临床药理学杂志, 2015(15):1506-1508.
银杏叶(Ginkgo biloba L.)	40	银杏叶制剂对老年痴呆患者早期认知功能的效果研究	2015	叶雄誉. 银杏叶制剂对老年痴呆患者早期认知功能的效果研究[J]. 中国现代药物应用, 2015(15):180-181.
枸杞子(Fructus Lycii)、墨旱莲(Eclipta prostrata L.)、生地黄(Radix Rehmanniae)、菊花(Chrysanthemum morifolium Ramat.)、山萸肉(Fructus Corni)、女贞子(Ligustrum lucidum)、山药(Rhizoma Dioscoreae)、茯苓(Poria cocos)、泽泻(Rhizoma Alismatis)、牡丹皮(Cortex Moutan)(Cortex Moutan)	19/16/35	运用滋补肝肾法治疗老年痴呆及远期疗效观察	2015	胡银柱. 运用滋补肝肾法治疗老年痴呆及远期疗效观察[J]. 光明中医, 2015(8):1693-1694.
枸杞(Fructus Lycii)、炙远志(Radix Polygalae)、胆南星(Arisaema Cum Bile)、何首乌(Radix Polygoni Multiflori)、郁金(Radix Curcumae)、丹参(Radix Salviae Miltiorrhizae)、甘草(Radix Glycyrrhizae)、熟地黄(Radix Rehmanniae)、当归(Radix Angelicae Sinensis)、山萸肉(Fructus Corni)、火麻仁(Cannabis sativa)、黄芪(Radix Astragali)	49	中西医结合疗法治疗脑卒中所致老年痴呆的临床疗效分析	2016	李莉. 中西医结合疗法治疗脑卒中所致老年痴呆的临床疗效分析[J]. 当代医学, 2016, 22(27):162-163.
当归(Radix Angelicae Sinensis)、枸杞(Fructus Lycii)、熟地黄(Radix Rehmanniae)、何首乌(Radix Polygoni Multiflori)、山萸肉(Fructus Corni)、泽泻(Rhizoma Alismatis)、甘草(Radix Glycyrrhizae)、郁金(Radix Curcumae)、丹参(Radix Salviae Miltiorrhizae)、火麻仁(Cannabis sativa)、胆南星(Arisaema Cum Bile)、黄芪(Radix Astragali)、( 炙) 远志(Radix Polygalae)	30/32/62	中西医结合疗法治疗脑卒中所致老年痴呆的临床疗效分析	2015	颜志刚. 中西医结合疗法治疗脑卒中所致老年痴呆的临床疗效分析[J]. 实用心脑肺血管病杂志, 2015(1).
熟地(Radix Rehmanniae)、首乌(Radix Polygoni Multiflori)、菟丝子(Semen Cuscutae)、枸杞子(Fructus Lycii)、巴戟天(Morinda officinalis)、山萸肉(Fructus Corni)、石菖蒲(Rhizoma Acori Tatarinowii)、丹参(Radix Salviae Miltiorrhizae)、益智仁(Sharpleaf Galangal Fruit)、胆南星(Arisaema Cum Bile)、黄芪(Radix Astragali)、川芎(Rhizoma Chuanxiong)、天麻(Rhizoma Gastrodiae)、远志(Radix Polygalae)	16/14/30	中西医结合治疗多发梗塞性痴呆临床观察	2007	梁文华. 中西医结合治疗多发梗塞性痴呆临床观察[J]. 山西中医, 2007, 23(3):25-26.
熟地(Radix Rehmanniae)、当归(Radix Angelicae Sinensis)、党参(Radix Codonopsis)、炙甘草(Radix Glycyrrhizae)、远志(Radix Polygalae)、杏仁(Prunus armeniaca L.)、鹿角胶(Deerhorn Glue)、龟板胶、阿胶(Equus Asinus L.)、紫河车(Dried Human Placenta)	19/11/30	中西医结合治疗老年痴呆40例临床观察	2007	董军梅, 李桢, 安玲. 中西医结合治疗老年痴呆40例临床观察[J]. 中国医药指南, 2007(s1):132-133.
黄芪(Radix Astragali)、石菖蒲(Rhizoma Acori Tatarinowii)、党参(Radix Codonopsis)、郁金(Radix Curcumae)、当归(Radix Angelicae Sinensis)、山茱萸(Fructus Corni)、胆南星(Arisaema Cum Bile)、何首乌(Radix Polygoni Multiflori)、丹参(Radix Salviae Miltiorrhizae)、泽泻(Rhizoma Alismatis)、炙远志(Radix Polygalae)、火麻仁(Cannabis sativa)	25/35/60	中西医结合治疗老年痴呆60例临床观察	2015	黎鼎盛. 中西医结合治疗老年痴呆60例临床观察[J]. 湖南中医杂志, 2015, 31(4):51-52.
熟地(Radix Rehmanniae)、枸杞(Fructus Lycii)、当归(Radix Angelicae Sinensis)、黄芪(Radix Astragali)、制首乌(Radix Polygoni Multiflori)、丹参(Radix Salviae Miltiorrhizae)、石菖蒲(Rhizoma Acori Tatarinowii)、柏子仁(Semen Platycladi)、远志(Radix Polygalae)、川穹(Rhizoma Chuanxiong)、三七(Panax notoginseng)、甘草(Radix Glycyrrhizae)	13/17/30	中西医结合治疗老年痴呆的临床观察	2012	王廷玉, 潘朝霞, 何秀贞,等. 中西医结合治疗老年痴呆的临床观察[J]. 中外医疗, 2012, 31(24):15-16.
熟地(Radix Rehmanniae)、当归(Radix Angelicae Sinensis)、山萸肉(Fructus Corni)、枸杞(Fructus Lycii)、何首乌(Radix Polygoni Multiflori)、丹参(Radix Salviae Miltiorrhizae)、甘草(Radix Glycyrrhizae)、泽泻(Rhizoma Alismatis)、郁金(Radix Curcumae)、黄芪(Radix Astragali)、火麻仁(Cannabis sativa)、炙远志(Radix Polygalae)、胆星	53	中西医结合治疗老年痴呆的临床观察	2014	赵磊, 尹玉霞. 中西医结合治疗老年痴呆的临床观察[J]. 中国医学创新, 2014(2):103-104.
党参(Radix Codonopsis)、当归(Radix Angelicae Sinensis)、黄芪(Radix Astragali)、山萸肉(Fructus Corni)、何首乌(Radix Polygoni Multiflori)、丹参(Radix Salviae Miltiorrhizae)、泽泻(Rhizoma Alismatis)、郁金(Radix Curcumae)、火麻仁(Cannabis sativa)、石菖蒲(Rhizoma Acori Tatarinowii)、胆星、炙远志(Radix Polygalae)	22/20/42	中西医结合治疗老年痴呆效果分析	2011	高学祯. 中西医结合治疗老年痴呆效果分析[J]. 中国医药导报, 2011, 08(13):91-93.
黄芪(Radix Astragali)、人参(Panax ginseng C. A. Mey.)、炙甘草(Radix Glycyrrhizae)、葛根(Radix Puerariae)、升麻(Rhizoma Cimicifugae)、蔓荆子(Vitex trifolia)、芍药(Paeonia lactiflora Pall.)、黄柏(Cortex Phellodendri)、川芎(Rhizoma Chuanxiong)、丹参(Radix Salviae Miltiorrhizae)	46	中西医结合治疗老年痴呆症46例疗效观察	2010	尹元香. 中西医结合治疗老年痴呆症46例疗效观察[J]. 山东医药, 2010, 50(37):90-91.
芍药(Paeonia lactiflora Pall.)、川芎(Rhizoma Chuanxiong)、黄柏(Cortex Phellodendri)、人参(Panax ginseng C. A. Mey.)、黄芪(Radix Astragali)、蔓荆子(Vitex trifolia)、葛根(Radix Puerariae)、丹参(Radix Salviae Miltiorrhizae)、升麻(Rhizoma Cimicifugae)、炙甘草(Radix Glycyrrhizae)	12/9/21	中西医结合治疗老年性痴呆42例临床观察	2015	陈煦. 中西医结合治疗老年性痴呆42例临床观察[J]. 深圳中西医结合杂志, 2015, 25(9):57-58.
黄芪(Radix Astragali)、龟板、杜仲(Eucommia ulmoides)、何首乌(Radix Polygoni Multiflori)、丹参(Radix Salviae Miltiorrhizae)、红花(Flos Carthami)、熟地(Radix Rehmanniae)、石菖蒲(Rhizoma Acori Tatarinowii)、远志(Radix Polygalae)、枸杞子(Fructus Lycii)、水蛭(Hirudo)、穿山甲(Manis pentadactyla Linnaeus)、三七(Panax notoginseng)粉、红景天(Rhodiola rosea)	47/3/50	中西医结合治疗老年性痴呆50例	2010	孙福顺. 中西医结合治疗老年性痴呆50例[J]. 辽宁中医杂志, 2010(6):1094-1094.
菟丝子(Semen Cuscutae)、灵芝(Ganoderma lucidum (Leyss. ex Fr.) Karst.)、川芎(Rhizoma Chuanxiong)、黄精(Polygonatum sibiricum Delar. ex Redoute)、远志(Radix Polygalae)、黄芪(Radix Astragali)、枸杞子(Fructus Lycii)、郁金(Radix Curcumae)、制首乌(Radix Polygoni Multiflori)、益智仁(Sharpleaf Galangal Fruit)、石菖蒲(Rhizoma Acori Tatarinowii)、茯苓(Poria cocos)	34/22/56	中西医结合治疗老年性痴呆112例临床观察	2012	钱超, 姜亚军. 中西医结合治疗老年性痴呆112例临床观察[J]. 长春中医药大学学报, 2012, 28(2):307-308.
何首乌(Radix Polygoni Multiflori)、黄芪(Radix Astragali)、生地(Radix Rehmanniae)、知母(Anemarrhena asphodeloides)、山萸肉(Fructus Corni)、枸杞子(Fructus Lycii)、胆南星(Arisaema Cum Bile)、石菖蒲(Rhizoma Acori Tatarinowii)、香附(Cyperus rotundus L.)、川芎(Rhizoma Chuanxiong)、郁金(Radix Curcumae)、白术(Atractylodes macrocephala Koidz.)、制附子(Aconitum carmichaeli)、天麻(Rhizoma Gastrodiae)	17/23/40	中西医结合治疗血管性痴呆	2011	申罗英, 刘英斌. 中西医结合治疗血管性痴呆[J]. 新乡医学院学报, 2011, 19(4):93-94.
熟地黄(Radix Rehmanniae)、制首乌(Radix Polygoni Multiflori)、肉苁蓉(Herba Cistanches)、山萸肉(Fructus Corni)、黄芪(Radix Astragali)、枸杞子(Fructus Lycii)、茯苓(Poria cocos)、泽泻(Rhizoma Alismatis)、牛膝(Achyranthes bidentata)、当归(Radix Angelicae Sinensis)、川芎(Rhizoma Chuanxiong)、生白芍(Paeonia lactiflora)、陈皮(Pericarpium Citri Reticulatae)、姜半夏(Pinellia ternata(Thunb.)Breit.)、全瓜蒌(Trichosanthes kirilowii Maxim.)、石菖蒲(Rhizoma Acori Ta…	19/11/30	中西医治疗老年性痴呆的临床对照观察	2016	谢勇. 中西医治疗老年性痴呆的临床对照观察[J]. 世界中西医结合杂志, 2016, 11(2):221-223.
山茱萸(Fructus Corni)、菟丝子(Semen Cuscutae)、益智仁(Sharpleaf Galangal Fruit)、郁金(Radix Curcumae)、胆南星(Arisaema Cum Bile)、锁阳(Cynomorium songaricum)、远志(Radix Polygalae)、石菖蒲(Rhizoma Acori Tatarinowii)、沙苑子(Semen Astragali Complanati)、水蛭(Hirudo)、丹参(Radix Salviae Miltiorrhizae)、川芎(Rhizoma Chuanxiong)、赤芍(Radix Paeoniae Rubra)、生山楂(Crataegus pinnatifida)	42/30/72	中药醒脑汤治疗老年性痴呆72例	2011	郭玉红. 中药醒脑汤治疗老年性痴呆72例[J]. 中国中医药现代远程教育, 2011, 09(10):27-28.
菟丝子(Semen Cuscutae)、枸杞子(Fructus Lycii)、灵芝(Ganoderma lucidum (Leyss. ex Fr.) Karst.)、黄连(Rhizoma Coptidis)、黄精(Polygonatum sibiricum Delar. ex Redoute)、黄芪(Radix Astragali)、制何首乌(Radix Polygoni Multiflori)、肉苁蓉(Herba Cistanches)、茯神、水蛭(Hirudo)、益智仁(Sharpleaf Galangal Fruit)、川芎(Rhizoma Chuanxiong)、郁金(Radix Curcumae)、远志(Radix Polygalae)、石菖蒲(Rhizoma Acori Tatarinowii)、炙甘草(Radix Glycyrrhizae)	24/19/43	中药与灸法并用治疗老年痴呆症的临床研究	2011	唐云华, 康秀丽. 中药与灸法并用治疗老年痴呆症的临床研究[J]. 中医学报, 2011, 26(6):763-764.
酒大黄(Radix et Rhizoma Rhei)、当归(Radix Angelicae Sinensis)、菖蒲(Rhizoma Acori Tatarinowii)、郁金(Radix Curcumae)、远志(Radix Polygalae)、川芎(Rhizoma Chuanxiong)、山茱萸(Fructus Corni)、熟地(Radix Rehmanniae)、黄芪(Radix Astragali)、益智仁(Sharpleaf Galangal Fruit)、鹿角胶(Deerhorn Glue)	50	中医辅助治疗老年痴呆症疗效及对其各项症状的改善状况分析	2016	金静娴. 中医辅助治疗老年痴呆症疗效及对其各项症状的改善状况分析[J]. 中国初级卫生保健, 2016, 30(6):68-69.
黄芪(Radix Astragali)、白芍(Paeonia lactiflora)、鸡血藤(Caulis Spatholobi)、熟地黄(Radix Rehmanniae)、白术(Atractylodes macrocephala Koidz.)、葛根(Radix Puerariae)、桂枝(Cinnamomum cassia)、丹参(Radix Salviae Miltiorrhizae)、红参(Panax ginseng C. A. Mey.)、当归(Radix Angelicae Sinensis)、槟榔(Areca catechu)、石菖蒲(Rhizoma Acori Tatarinowii)、柴胡(Radix Bupleuri)、香附(Cyperus rotundus L.)、升麻(Rhizoma Cimicifugae)、制半夏(Pinellia ternata(Thunb…	32/14/46	重用黄芪自拟方联合奥拉西坦胶囊对脑卒中后痴呆患者高级脑功能的影响	2016	姜续成, 李松. 重用黄芪自拟方联合奥拉西坦胶囊对脑卒中后痴呆患者高级脑功能的影响[J]. 新中医, 2016(7):35-37.
黄芪(Radix Astragali)、党参(Radix Codonopsis)、当归(Radix Angelicae Sinensis)、赤芍(Radix Paeoniae Rubra)、红花(Flos Carthami)、川芎(Rhizoma Chuanxiong)、杜仲(Eucommia ulmoides)、益智仁(Sharpleaf Galangal Fruit)、水蛭(Hirudo)、丹参(Radix Salviae Miltiorrhizae)、木香(Radix Aucklandiae)	26/14/40	自拟补气活血汤治疗老年痴呆症的临床观察	2011	钟岩. 自拟补气活血汤治疗老年痴呆症的临床观察[J]. 中西医结合心脑血管病杂志, 2011, 09(4):501-503.
何首乌(Radix Polygoni Multiflori)、枸杞子(Fructus Lycii)、熟地(Radix Rehmanniae)、山茱萸(Fructus Corni)、淫羊藿(Herba Epimedii)、菟丝子(Semen Cuscutae)、巴戟天(Morinda officinalis)、肉苁蓉(Herba Cistanches)、丹参(Radix Salviae Miltiorrhizae)、川芎(Rhizoma Chuanxiong)、桃仁(Juglans regia)、红花(Flos Carthami)、石菖蒲(Rhizoma Acori Tatarinowii)、远志(Radix Polygalae)、	17/19/36	自拟补肾活血益智汤治疗血管性痴呆36例	2009	孟更民. 自拟补肾活血益智汤治疗血管性痴呆36例[J]. 实用中医内科杂志, 2009, 23(8).
丹参(Radix Salviae Miltiorrhizae)、枸杞子(Fructus Lycii)、郁金(Radix Curcumae)、川芎(Rhizoma Chuanxiong)、赤芍(Radix Paeoniae Rubra)药、熟地黄(Radix Rehmanniae)、当归(Radix Angelicae Sinensis)	45	自拟复方丹参汤结合认知锻炼对老年痴呆患者躯体功能及记忆功能的影响	2015	周芹. 自拟复方丹参汤结合认知锻炼对老年痴呆患者躯体功能及记忆功能的影响[J]. 四川中医, 2015(6):84-86.
人参(Panax ginseng C. A. Mey.)、山药(Rhizoma Dioscoreae)、熟地(Radix Rehmanniae)、胡桃仁(Juglans regia)、淫羊藿(Herba Epimedii)、枸杞子(Fructus Lycii)、巴戟天(Morinda officinalis)、草决明(Cassia tora L)、泽泻(Rhizoma Alismatis)、石菖蒲(Rhizoma Acori Tatarinowii)、远志(Radix Polygalae)、丹参(Radix Salviae Miltiorrhizae)、山楂(Crataegus pinnatifida)、制首乌(Radix Polygoni Multiflori)、川芎(Rhizoma Chuanxiong)、当归(Radix Angelicae Sinensis)、炙甘草(Radix …	34	自拟益肾聪脑汤结合西药治疗老年痴呆病34例	2012	龚澄. 自拟益肾聪脑汤结合西药治疗老年痴呆病34例[J]. 实用中医内科杂志, 2012(12):41-42.
制附片(Aconitum carmichaeli)、黄芪(Radix Astragali)、丹参(Radix Salviae Miltiorrhizae)、益智仁(Sharpleaf Galangal Fruit)、何首乌(Radix Polygoni Multiflori)、补骨脂(Psoralea corylifolia)、川芎(Rhizoma Chuanxiong)、枳实(Fructus Aurantii Immaturus)、法半夏(Pinellia ternata(Thunb.)Breit.)、茯苓(Poria cocos)、鸡血藤(Caulis Spatholobi)、	35/15/50	自拟中药方剂治疗老年性痴呆患者疗效的临床观察	2014	宋艳玲. 自拟中药方剂治疗老年性痴呆患者疗效的临床观察[J]. 中国医药指南, 2014(30):276-277.
