# Supplementary material for: A strategy to find novel candidate anti-Alzheimer’s disease drugs by constructing interaction networks between drug targets and natural compounds in medical plants
Source: PeerJ. 2018 May 11;6:e4756. doi: 10.7717/peerj.4756 (PMC5951129; doi:10.7717/peerj.4756)
Supplement: Table S3 [file peerj-06-4756-s003.xlsx]

## Sheet: Sheet1
Integrity Protein Name	PDB ID	Best Ligand Number	Ligands ID	Similarity
PLA2	1db4	20528	8IN	0.27027
HMG-COA	1dqa	21781	NAP	0.156915
Caspase-3	1nme	5981	159	0.147887
MAOB	1oja	2226	ISN	0.14359
PDE4	1tb7	6866	AMP	0.160772
Ftase	1tn6	22321	FII	0.1
QC	2afw	8592	AHN	0.12
TNF	2az5	8548	307	0.211538
IDO	2d0t	13079	PIM	0.123377
Fyn	2dq7	22842	STU	0.145374
HDAC	2vqm	8546	HA3	0.140351
MAOA	2z5y	15985	HRM	0.130081
lyn	3a4o	6094	STU	0.189415
JNK	3g9n	24508	J88	0.245791
EGFR	3ika	12243	0UN	0.22291
RAR	3kmr	16225	EQN	0.2
RAGE	3o3u	6107	MLR	0.136986
BACE-1	4dju	8548	0KK	0.2
AchE	4ey5	24829	HUP	0.47541
GABA(B)	4ms4	17590	2C0	0.101887
RXR	4oc7	16224	2QO	0.153439
MGLUR	4xar	7446	40F	0.230769
DYRK1A	4ylk	22842	4E2	0.0606061
GLP-1R	4zgm	8525	32M	0.105263
SIRT1	4zzj	8201	4TQ	0.180451
FGFR1	5a46	6041	38O	0.146758
α7NACHR	5afh	8548	L0B	0.457944
AMPA	5h8s	8548	5YC	0.113043
SIG-1R	5hk1	20387	61W	0.0877193
CKI-δ	5ih5	24721	AUE	0.08867
