# Supplementary material for: A strategy to find novel candidate anti-Alzheimer’s disease drugs by constructing interaction networks between drug targets and natural compounds in medical plants
Source: PeerJ. 2018 May 11;6:e4756. doi: 10.7717/peerj.4756 (PMC5951129; doi:10.7717/peerj.4756)
Supplement: Table S4 [file peerj-06-4756-s004.xlsx]

## Sheet: Sheet1
Integrity Protein Name	PDB ID	Original Ligand Docking Energy	Highest Docking Energy of top0.5% TCM compounds	Lowest Docking Energy of top0.5% TCM compounds	Average Docking Energy of top0.5% TCM compounds	Donepezil	Galantamine	Rivastigmine
AchE	4ey5	-8.5	-9.01	-10.6	-9.36	-5.83	-6.31	-5.41
