# Supplementary material for: A strategy to find novel candidate anti-Alzheimer’s disease drugs by constructing interaction networks between drug targets and natural compounds in medical plants
Source: PeerJ. 2018 May 11;6:e4756. doi: 10.7717/peerj.4756 (PMC5951129; doi:10.7717/peerj.4756)
Supplement: Table S5 [file peerj-06-4756-s005.xlsx]

## Sheet: 1db4
Protein PLA2
Cluster	Cluster Center	Cluster Center Structure	Cluster Size
1	8619		16
2	16577		2
3	23239		3
4	29115		44
5	15227		13
6	10666		14
7	35233		10
8	18568		7
9	29162		3
10	12767		14
