# Supplementary material for: A strategy to find novel candidate anti-Alzheimer’s disease drugs by constructing interaction networks between drug targets and natural compounds in medical plants
Source: PeerJ. 2018 May 11;6:e4756. doi: 10.7717/peerj.4756 (PMC5951129; doi:10.7717/peerj.4756)
Supplement: Table S7 [file peerj-06-4756-s007.xlsx]

## Sheet: 1nme
Protein Caspase-3
Cluster	Cluster Center	Cluster Center Structure	Cluster Size
1	10519		11
2	29529		13
3	6477		32
4	6109		10
5	6118		16
6	8546		16
7	8837		19
8	21339		2
9	12243		6
10	28982		2
