# Supplementary material for: A strategy to find novel candidate anti-Alzheimer’s disease drugs by constructing interaction networks between drug targets and natural compounds in medical plants
Source: PeerJ. 2018 May 11;6:e4756. doi: 10.7717/peerj.4756 (PMC5951129; doi:10.7717/peerj.4756)
Supplement: Table S8 [file peerj-06-4756-s008.xlsx]

## Sheet: 1oja
Protein MAOB
Cluster	Cluster Center	Cluster Center Structure	Cluster Size
1	30035		10
2	16577		1
3	19600		23
4	23809		5
5	20876		6
6	37526		23
7	5041		11
8	28808		4
9	19300		1
10	15332		22
