# Supplementary material for: A strategy to find novel candidate anti-Alzheimer’s disease drugs by constructing interaction networks between drug targets and natural compounds in medical plants
Source: PeerJ. 2018 May 11;6:e4756. doi: 10.7717/peerj.4756 (PMC5951129; doi:10.7717/peerj.4756)
Supplement: Table S9 [file peerj-06-4756-s009.xlsx]

## Sheet: 1tb7
Protein PDE4
Cluster	Cluster Center	Cluster Center Structure	Cluster Size
1	6118		26
2	27002		14
3	22169		3
4	7556		14
5	15967		24
6	26626		1
7	28982		2
8	8619		10
9	12879		12
10	18582		20
