# Supplementary material for: A strategy to find novel candidate anti-Alzheimer’s disease drugs by constructing interaction networks between drug targets and natural compounds in medical plants
Source: PeerJ. 2018 May 11;6:e4756. doi: 10.7717/peerj.4756 (PMC5951129; doi:10.7717/peerj.4756)
Supplement: Table S10 [file peerj-06-4756-s010.xlsx]

## Sheet: 1tn6
Protein Ftase
Cluster	Cluster Center	Cluster Center Structure	Cluster Size
1	31014		18
2	5693		12
3	18365		12
4	8196		6
5	28982		3
6	15503		27
7	6481		21
8	15216		10
9	12240		6
10	8546		13
