# Supplementary material for: A strategy to find novel candidate anti-Alzheimer’s disease drugs by constructing interaction networks between drug targets and natural compounds in medical plants
Source: PeerJ. 2018 May 11;6:e4756. doi: 10.7717/peerj.4756 (PMC5951129; doi:10.7717/peerj.4756)
Supplement: Table S11 [file peerj-06-4756-s011.xlsx]

## Sheet: 2afw
Protein QC
Cluster	Cluster Center	Cluster Center Structure	Cluster Size
1	8619		18
2	29514		11
3	6472		12
4	26628		1
5	22699		10
6	17664		22
7	11642		13
8	33175		1
9	26629		10
10	35146		25
