# Supplementary material for: A strategy to find novel candidate anti-Alzheimer’s disease drugs by constructing interaction networks between drug targets and natural compounds in medical plants
Source: PeerJ. 2018 May 11;6:e4756. doi: 10.7717/peerj.4756 (PMC5951129; doi:10.7717/peerj.4756)
Supplement: Table S13 [file peerj-06-4756-s013.xlsx]

## Sheet: 2d0t
Protein IDO
Cluster	Cluster Center	Cluster Center Structure	Cluster Size
1	14598		24
2	16951		2
3	15235		13
4	22169		4
5	35138		24
6	22930		3
7	15497		10
8	20024		7
9	21339		5
10	25667		28
