# Supplementary material for: A strategy to find novel candidate anti-Alzheimer’s disease drugs by constructing interaction networks between drug targets and natural compounds in medical plants
Source: PeerJ. 2018 May 11;6:e4756. doi: 10.7717/peerj.4756 (PMC5951129; doi:10.7717/peerj.4756)
Supplement: Table S14 [file peerj-06-4756-s014.xlsx]

## Sheet: 2dq7
Protein Fyn
Cluster	Cluster Center	Cluster Center Structure	Cluster Size
1	18108		3
2	8636		8
3	1314		49
4	23239		3
5	16577		2
6	2481		2
7	24340		6
8	29113		17
9	23111		23
10	12261		14
