# Supplementary material for: A strategy to find novel candidate anti-Alzheimer’s disease drugs by constructing interaction networks between drug targets and natural compounds in medical plants
Source: PeerJ. 2018 May 11;6:e4756. doi: 10.7717/peerj.4756 (PMC5951129; doi:10.7717/peerj.4756)
Supplement: Table S16 [file peerj-06-4756-s016.xlsx]

## Sheet: 2z5y
Protein MAOA
Cluster	Cluster Center	Cluster Center Structure	Cluster Size
1	13642		15
2	23386		2
3	30714		5
4	35231		9
5	20877		7
6	15334		21
7	26905		22
8	1517		12
9	29958		2
10	22501		15
