# Supplementary material for: A strategy to find novel candidate anti-Alzheimer’s disease drugs by constructing interaction networks between drug targets and natural compounds in medical plants
Source: PeerJ. 2018 May 11;6:e4756. doi: 10.7717/peerj.4756 (PMC5951129; doi:10.7717/peerj.4756)
Supplement: Table S17 [file peerj-06-4756-s017.xlsx]

## Sheet: 3a4o
Protein lyn
Cluster	Cluster Center	Cluster Center Structure	Cluster Size
1	8619		16
2	16105		20
3	6471		13
4	11642		18
5	17084		2
6	6055		29
7	9101		10
8	18569		7
9	12280		11
10	22930		1
