# Supplementary material for: A strategy to find novel candidate anti-Alzheimer’s disease drugs by constructing interaction networks between drug targets and natural compounds in medical plants
Source: PeerJ. 2018 May 11;6:e4756. doi: 10.7717/peerj.4756 (PMC5951129; doi:10.7717/peerj.4756)
Supplement: Table S18 [file peerj-06-4756-s018.xlsx]

## Sheet: 3g9n
Protein JNK(SAPK1)
Cluster	Cluster Center	Cluster Center Structure	Cluster Size
1	5625		4
2	8546		13
3	16105		23
4	29898		1
5	18582		9
6	18013		10
7	1735		29
8	26093		4
9	29388		5
10	29115		26
