# Supplementary material for: A strategy to find novel candidate anti-Alzheimer’s disease drugs by constructing interaction networks between drug targets and natural compounds in medical plants
Source: PeerJ. 2018 May 11;6:e4756. doi: 10.7717/peerj.4756 (PMC5951129; doi:10.7717/peerj.4756)
Supplement: Table S19 [file peerj-06-4756-s019.xlsx]

## Sheet: 3ika
Protein EGFR
Cluster	Cluster Center	Cluster Center Structure	Cluster Size
1	31009		30
2	31023		10
3	9102		23
4	17553		6
5	17084		3
6	28467		1
7	8619		16
8	35138		26
9	22930		1
10	6499		11
