# Supplementary material for: A strategy to find novel candidate anti-Alzheimer’s disease drugs by constructing interaction networks between drug targets and natural compounds in medical plants
Source: PeerJ. 2018 May 11;6:e4756. doi: 10.7717/peerj.4756 (PMC5951129; doi:10.7717/peerj.4756)
Supplement: Table S20 [file peerj-06-4756-s020.xlsx]

## Sheet: 3kmr
Protein RAR
Cluster	Cluster Center	Cluster Center Structure	Cluster Size
1	24036		7
2	10625		5
3	16577		1
4	15554		7
5	28986		3
6	14199		25
7	19057		17
8	28939		24
9	15991		11
10	7337		10
