# Supplementary material for: A strategy to find novel candidate anti-Alzheimer’s disease drugs by constructing interaction networks between drug targets and natural compounds in medical plants
Source: PeerJ. 2018 May 11;6:e4756. doi: 10.7717/peerj.4756 (PMC5951129; doi:10.7717/peerj.4756)
Supplement: Table S22 [file peerj-06-4756-s022.xlsx]

## Sheet: 4dju
Protein BACE-1
Cluster	Cluster Center	Cluster Center Structure	Cluster Size
1	8855		17
2	24340		5
3	10678		18
4	10519		6
5	12261		8
6	23647		3
7	8625		18
8	21782		3
9	6102		17
10	25667		34
