# Supplementary material for: A strategy to find novel candidate anti-Alzheimer’s disease drugs by constructing interaction networks between drug targets and natural compounds in medical plants
Source: PeerJ. 2018 May 11;6:e4756. doi: 10.7717/peerj.4756 (PMC5951129; doi:10.7717/peerj.4756)
Supplement: Table S24 [file peerj-06-4756-s024.xlsx]

## Sheet: 4ms4
Protein GABA(B)
Cluster	Cluster Center	Cluster Center Structure	Cluster Size
1	20165		16
2	30035		31
3	28963		1
4	24508		2
5	27239		25
6	35295		1
7	28362		2
8	26629		7
9	25848		27
10	30977		7
