# Supplementary material for: A strategy to find novel candidate anti-Alzheimer’s disease drugs by constructing interaction networks between drug targets and natural compounds in medical plants
Source: PeerJ. 2018 May 11;6:e4756. doi: 10.7717/peerj.4756 (PMC5951129; doi:10.7717/peerj.4756)
Supplement: Table S27 [file peerj-06-4756-s027.xlsx]

## Sheet: 4ylk
Protein DYRK1A
Cluster	Cluster Center	Cluster Center Structure	Cluster Size
1	6019		13
2	20024		31
3	32126		4
4	445		7
5	26093		2
6	22339		9
7	12240		6
8	11453		20
9	17590		21
10	12750		12
