# Supplementary material for: A strategy to find novel candidate anti-Alzheimer’s disease drugs by constructing interaction networks between drug targets and natural compounds in medical plants
Source: PeerJ. 2018 May 11;6:e4756. doi: 10.7717/peerj.4756 (PMC5951129; doi:10.7717/peerj.4756)
Supplement: Table S30 [file peerj-06-4756-s030.xlsx]

## Sheet: 5a46
Protein FGFR1
Cluster	Cluster Center	Cluster Center Structure	Cluster Size
1	25667		30
2	23111		21
3	16577		1
4	19476		7
5	9102		10
6	6118		18
7	18568		5
8	8619		19
9	29162		3
10	12254		11
