# Supplementary material for: A strategy to find novel candidate anti-Alzheimer’s disease drugs by constructing interaction networks between drug targets and natural compounds in medical plants
Source: PeerJ. 2018 May 11;6:e4756. doi: 10.7717/peerj.4756 (PMC5951129; doi:10.7717/peerj.4756)
Supplement: Table S32 [file peerj-06-4756-s032.xlsx]

## Sheet: 5h8s
Protein AMPA
Cluster	Cluster Center	Cluster Center Structure	Cluster Size
1	25667		17
2	23111		14
3	23647		3
4	28468		2
5	8831		21
6	15497		19
7	6471		31
8	24260		1
9	18569		7
10	8200		12
